# Supplementary material
Source: PubMed Central journal article supplement (PMC5125523)
Supplement: NIHMS69863-supplement-Appendix_1.pdf [file NIHMS69863-supplement-Appendix_1.pdf]

## **Ambio**

Electronic Supplementary Material

*This supplementary material has not been peer reviewed.*

Title: **Gendered medicinal plant knowledge contributions to adaptive capacity and health sovereignty in Amazonia**

Authors: Díaz-Reviriego, I. , Fernández-Llamazares, Á., Salpeteur, M. Howard, P.L, Reyes-García, V.

---

### **Appendix S1.** Correspondence of vernacular names with scientific names

| <b>Vernacular name</b> | <b>Scientific name</b>                                      | <b>Taxonomic family</b> |
|------------------------|-------------------------------------------------------------|-------------------------|
| apainiqui              | <i>Pera benensis</i><br>(Rusby)                             | Euphorbiaceae           |
| arara                  | <i>Urera laciniata</i><br>(Goudot) Wedd<br><i>urticaria</i> | Urticaceae              |
| ashashaj               | <i>Citrus limon</i> (L.)<br>Burn                            | Rutaceae                |
| Ava' ava'              | <i>Prockia crucis</i> L.                                    | Salicaceae              |
| banana                 | <i>Musa x acuminata</i>                                     | Musaceae                |
| bätin                  | <i>Syagrus sancona</i><br>Karsten                           | Palmae                  |
| bejqui                 | <i>Hymenaea courbaril</i><br>L.                             | Leguminosae-Cae         |
| buisi                  | <i>Entada sp.</i>                                           | Leguminosae-Mim         |
| caji'si                | <i>Martinella ovovata</i><br>(H.B.K) Bureau &<br>Schumann   | Bignoniaceae            |
| cam                    | <i>Otoba parvifolia</i><br>(Markgraf) A.<br>Gentry          | Myristicaceae           |
| canau                  |                                                             |                         |
| cashcaria              | <i>Cinchona cf.</i><br><i>Officinalis</i> L.                | Rubiaceae               |
| cata                   |                                                             |                         |
| ca' babas              | <i>Olyra latifolia</i>                                      | Gramineae               |
| chij                   | <i>Triplaris americana</i><br>L.                            | Polygonaceae            |

---

|             |                                                                                               |                 |
|-------------|-----------------------------------------------------------------------------------------------|-----------------|
| chito       | <i>Tephrosia vogelii</i> J.<br>D. Leguminosae-<br>Pap                                         | Leguminosae-Pap |
| chorecho'   | <i>Aniba canelilla</i><br>(H.B.K.) Mez                                                        | Lauraceae       |
| chujbubuty  | Peperomia<br>rotundifolia (L.)<br>Kunth                                                       | Piperaceae      |
| chura'      | <i>Swietenia</i><br><i>macrophylla</i> (King)                                                 | Meliaceae       |
| conojfoto   | <i>Hura crepitans</i> L.                                                                      | Euphorbiaceae   |
| copaiva     | <i>Copaifera reticulata</i><br>Ducke                                                          | Fabaceae        |
| cos         | <i>Nicotina tabacum</i>                                                                       | Solanaceae      |
| coti'       | <i>Psidium guajava</i> L.                                                                     | Myrtaceae       |
| cravu       |                                                                                               |                 |
| curi        | <i>Lantana cf. Aristat</i>                                                                    | Verbenaceae     |
| curu        |                                                                                               |                 |
| dyesatdyes  | <i>Baccharis trinervis</i><br>(Lam) Pers.                                                     | Compositae      |
| ere'        | <i>Petiveria alliacea</i> L.                                                                  | Piperaceae      |
| ibiñe       |                                                                                               |                 |
| ijmeme      | <i>Myrcia fallax</i>                                                                          | Myrtaceae-Leg   |
| irepij      | <i>Ocimum</i><br><i>micranthum</i> Willd.                                                     | Labiatae        |
| itsi        | <i>Picramnia</i> aff.<br><i>Sellowii</i> Planchan<br>subsp <i>sprucanea</i><br>(Engl.) Pirari | Simaroubaceae   |
| jamo'tarara | <i>Margarita nobilis</i> L.F                                                                  | Euphorbiaceae   |
| macha       | <i>Amburana</i><br><i>caerensis</i>                                                           | Fabaceae        |
| manai       | <i>Attalea phalerata</i> C.<br>Martius ex Sprengel                                            | Palmae          |
| marva       | <i>Sida rhombifolia</i> L                                                                     | Malvaceae       |
| maschaty    |                                                                                               |                 |
| mature      | <i>Acmella oleracea</i>                                                                       | Compositae      |
| merique     | <i>Ananas comosus</i>                                                                         | Bromeliaceae    |

---

---

|             |                                                  |                 |
|-------------|--------------------------------------------------|-----------------|
| mojmosh     |                                                  |                 |
| morifi      | <i>Dichorisandra sp.</i>                         | Commelinaceae   |
| nashdyes    |                                                  |                 |
| orotas      |                                                  |                 |
| oteti       |                                                  | Amarilliadaceae |
| oveto       | <i>Uncaria guianensis</i><br>(Aubl.)             | Rubiaceae       |
| oyoj' oyoj  | <i>Urvillea sp.</i>                              | Sapindaceae     |
| parta       | <i>Persea americana</i><br>C. Miller             | Laureaceae      |
| potona      | <i>Kalanchoe pinnata</i><br>(Lamark) Persoon     | Crasulaceae     |
| punuvacdyes |                                                  |                 |
| que'tsetsej | <i>Davilla nitida</i> (Vahl)<br>Kubitzki         | Dilleniaceae    |
| rovocdyes   |                                                  |                 |
| saute       | <i>Zingiber officinale</i>                       | Zingiberaceae   |
| sebiria     | <i>Cymbopogon</i><br><i>citratus</i>             | Gramineae       |
| shepi       | <i>Gallesia integrifolia</i><br>(Sprengel) Harms | Phytolaccaceae  |
| shepi'is    | <i>Mansoa alliacea</i><br>(Lamark) A. Gentry     | Bignoniaceae    |
| shiveñi     |                                                  |                 |
| siyamo      | <i>Cedrela odorata</i> L.                        | Meliaceae       |
| sicoco      | <i>Chenopodium</i><br><i>ambrosioides</i>        | Chenopodiaceae  |
| tamtac      | <i>Galipea longiflora</i> K.<br>Krause           | Rutaceae        |
| tiribui     |                                                  |                 |
| titij       | <i>Ficus insipida</i> Willd                      | Moraceae        |
| tson' sonty | <i>Ampelocera</i><br><i>edentula</i> Kuhml       | Ulmaceae        |
| tubuij      | Gouania<br>adenophora                            | Rhamnaceae      |
| tyi'        | <i>Genipa americana</i><br>L.                    | Rubiaceae       |

---

---

|             |                                           |               |
|-------------|-------------------------------------------|---------------|
| tyi'mujmure | Piper pelatum<br>Ruiz&Pay                 | Piperaceae    |
| ufajre      | <i>Brugmansia arborea</i><br>(L.)         | Solanaceae    |
| undy        |                                           |               |
| u'puyu      | Piper laevigatum<br>Kunth                 | Piperaceae    |
| vambason    | <i>Aspidosperma</i><br><i>rigidum</i>     | Apocinaceae   |
| vashi       | <i>Serjania</i><br><i>caracasana</i>      | Sapindaceae   |
| vayori      | <i>Sparattanthelium</i><br><i>glabrum</i> | Hernandiaceae |
| vijsi       |                                           |               |
| viyucure    |                                           |               |
| vujnare     |                                           |               |
| yäcäni      |                                           |               |
| yän         |                                           |               |
| yantes      |                                           |               |
| yavitus     |                                           |               |

---

References consulted for linking vernacular names with scientific names:

Reyes-García, V. 2001. Indigenous people, ethnobotanical knowledge, and market economy. A case study of the Tsimane' Amerindians in lowland Bolivia. PhD Thesis, University of Florida

Huanca, T. 1999. Tsimane' Indigenous Knowledge. Swidden Fallow Management and Conservation. PhD Thesis, University of Florida

Guéze, M. 2011. Evaluation of tree diversity and utilization: the role of acculturation. A case study in the Bolivian Amazon. PhD Thesis, Institut de Ciència i Tecnologia Ambientals, Universitat Autònoma de Barcelona.

Ticona, J.P. 2010. Los chimane: conocimiento y uso de plantas medicinales en la comunidad de Tacuaral del Matos, Provincia Ballivian, Departamento del Beni. Bachelor Thesis, Universidad Mayor de San Andrés.
